# Supplementary material for: Collagen hydrogel viscoelasticity regulates MSC chondrogenesis in a ROCK-dependent manner
Source: PubMed Central journal article supplement (PMC9916999; doi:10.1126/sciadv.ade9497), 2023-02-10
Supplement: sciadv.ade9497_sm.pdf [file sciadv.ade9497_sm.pdf]

Supplementary Materials for  
**Collagen hydrogel viscoelasticity regulates MSC chondrogenesis in a  
ROCK-dependent manner**

Danyang Huang *et al.*

Corresponding author: Yun Xiao, [yun.xiao@scu.edu.cn](mailto:yun.xiao@scu.edu.cn)

*Sci. Adv.* **9**, eade9497 (2023)  
DOI: 10.1126/sciadv.ade9497

**This PDF file includes:**

Figs. S1 to S9

## Supplementary Materials

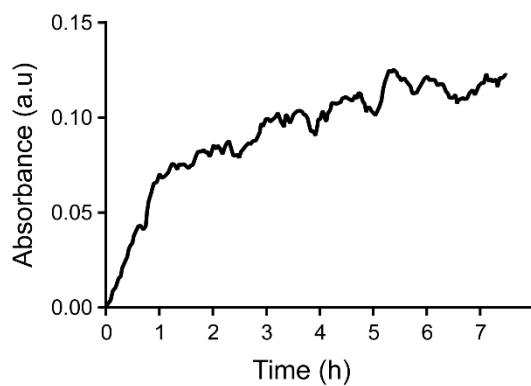

**Fig S1. Turbidity curve of collagen solution obtained at 313 nm and 4 °C. Collagen concentration: 3 mg/ml.**

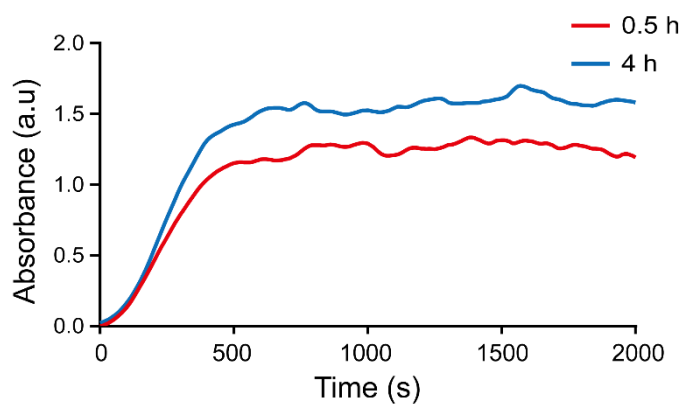

**Fig S2. Turbidity curves of collagen solution obtained at 313 nm and 37 °C after low-temperature incubation for 0.5 and 4 h. Collagen concentration: 3 mg/ml.**

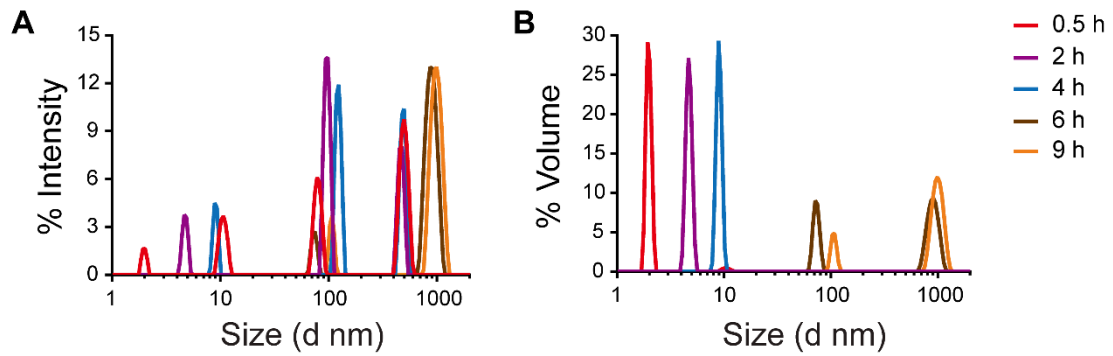

**Fig S3. The size distribution of collagen fibers in collagen solutions with different low-temperature incubation time. (A) Light intensity particle size distribution of collagen fibers. (B) Volume particle size distribution of collagen fibers. Collagen concentration: 3 mg/ml.**

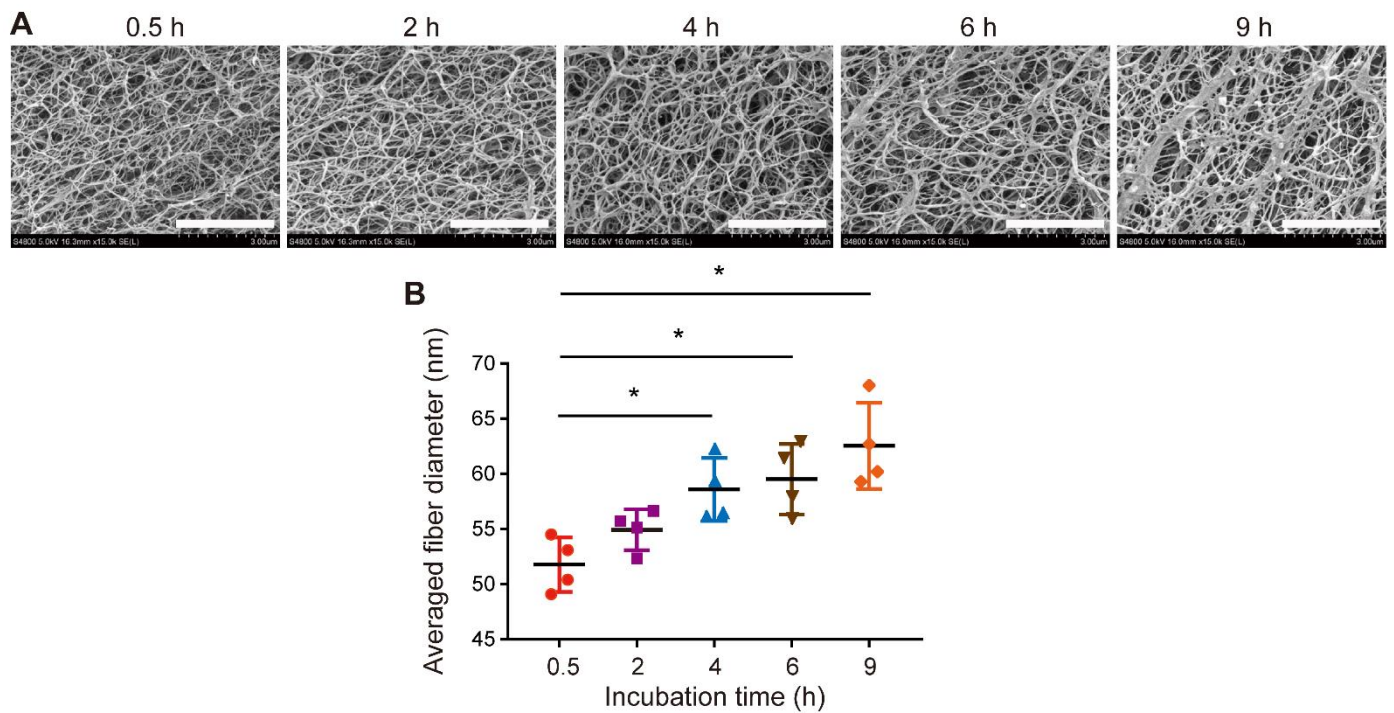

**Fig S4. SEM characterization of collagen fibers with different low-temperature incubation times. (A) SEM images of critical point-dried collagen hydrogels with various low-temperature incubation time. Scale bars, 3 μm. (B) Quantification of the diameter of collagen fibers (averaged from four regions;  $*P < 0.05$ ). Collagen concentration: 3 mg/ml.**

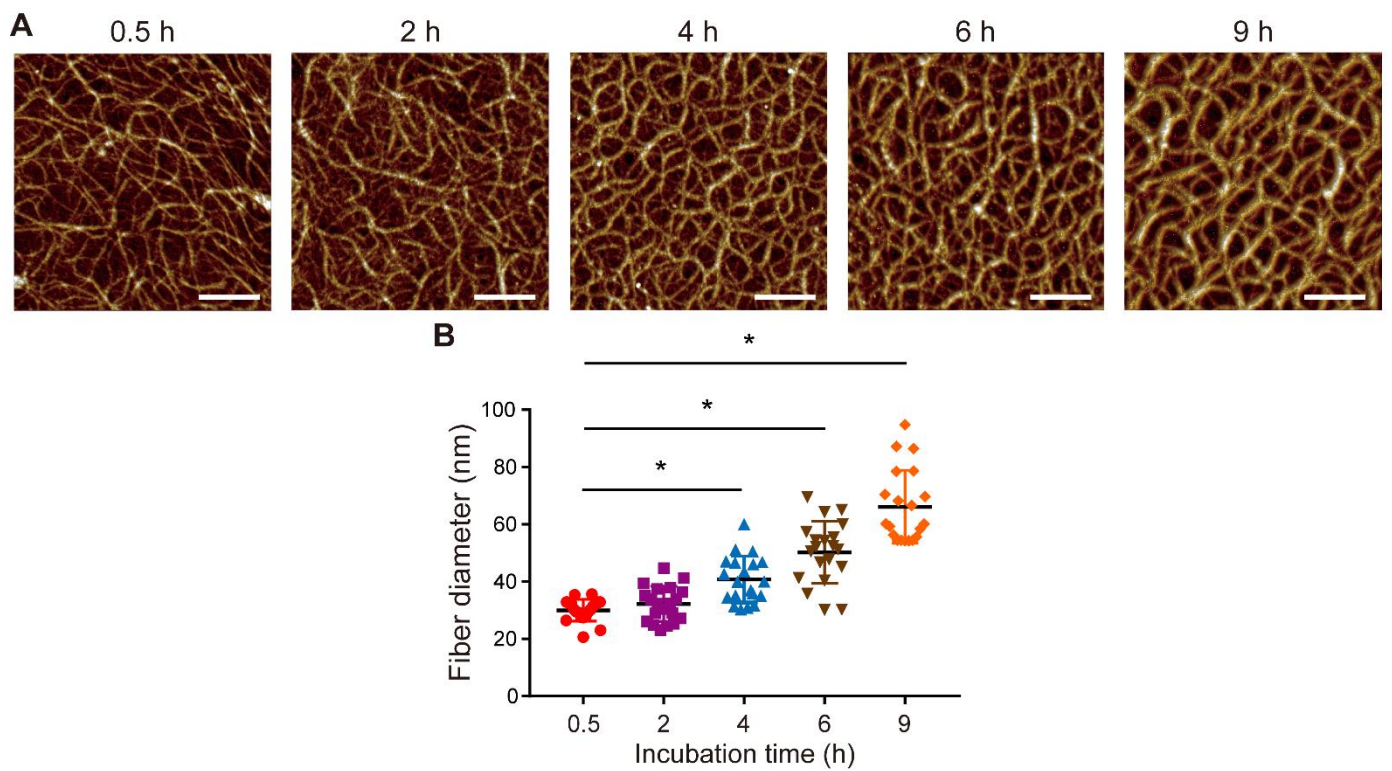

**Fig S5. AFM characterization of collagen fibers with different low-temperature incubation times. (A)** AFM images of dried collagen hydrogels with various low-temperature incubation time. Scale bars, 500 nm. **(B)** Diameter of individual collagen fibers with various low-temperature incubation time ( $n = 21$  single fibers from three regions per each condition;  $*P < 0.05$ ). Collagen concentration: 3 mg/ml.

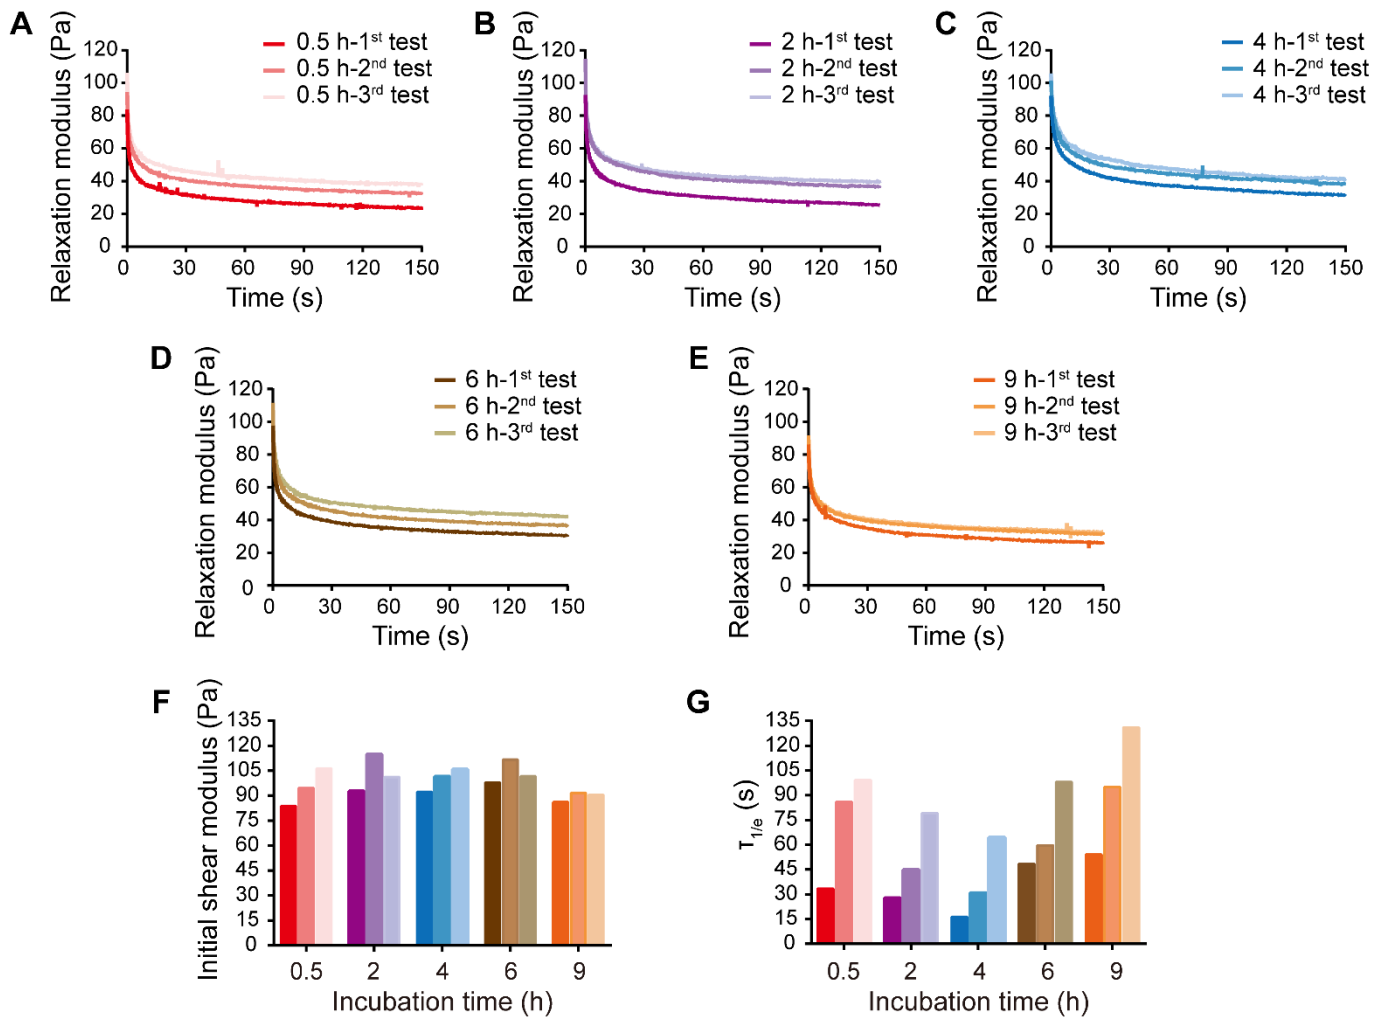

**Fig S6. Repeated stress relaxation tests of collagen hydrogels with various low-temperature incubation times.** (A-E) Representative repeated stress relaxation curves of collagen hydrogels with various low-temperature incubation time at a strain of 10%. (F) Initial shear modulus as determined by repeated stress relaxation tests of collagen hydrogels. (G) Time scale of repeated stress relaxation,  $\tau_{1/e}$ , for the different collagen hydrogels.

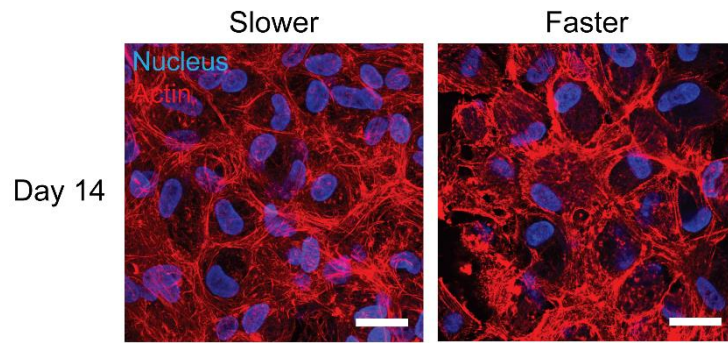

**Fig S7. Representative images of fluorescence staining for F-actin of MSCs cultured in hydrogels for 14 days. Scale bars, 10  $\mu$ m.**

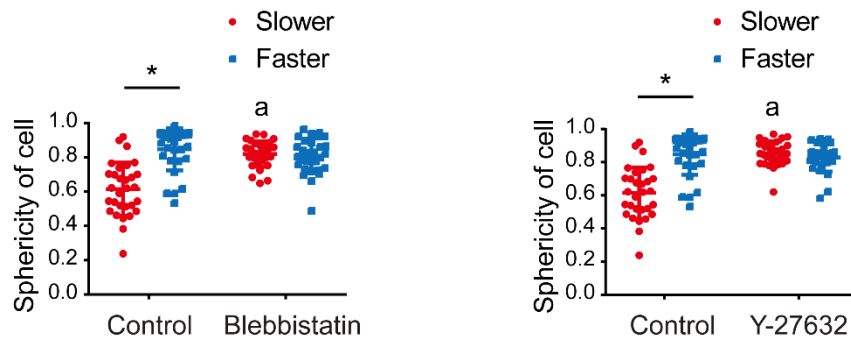

**Fig S8. Quantification of sphericity of cells in the presence of blebbistatin or Y-27632** (n = 30 single cells from three biological replications per each condition;  $*P < 0.05$ ); a indicates a significant difference ( $*P < 0.05$ ) compared with the slower hydrogels in control group.

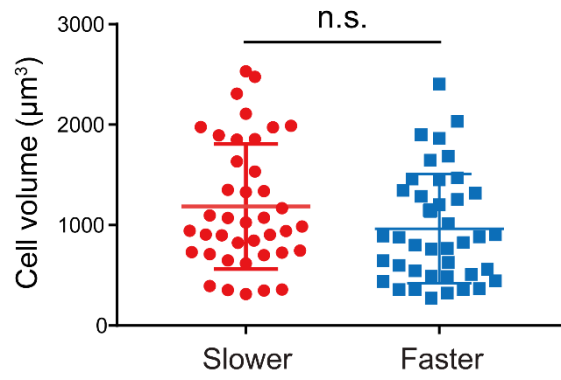

**Fig S9. Quantification of cell volume in slower/faster-relaxing groups on day 7** ( $n = 30$  single cells from three biological replications per each condition;  $P = 0.4073$ ).
